# Supplementary material for: The Lived Experience of Healthcare Workers in Preventing Falls in Community Dwelling Individuals with Dementia
Source: MDPI journal article supplement (doi:10.3390/geriatrics7050113), 2022-10-07
Supplement: s1 [file s1]

## **Supplementary Files**

### **Table S1**

#### **Interview Schedule**

|    | <b>Question and prompts</b>                                                                                                                                                                                                                                                                                                                                  | <b>Comments/<br/>observations</b> |
|----|--------------------------------------------------------------------------------------------------------------------------------------------------------------------------------------------------------------------------------------------------------------------------------------------------------------------------------------------------------------|-----------------------------------|
| 1. | How much of your caseload includes individuals affected by cognitive impairment and/or early dementia?                                                                                                                                                                                                                                                       |                                   |
| 2. | Are there any particular challenges or obstacles you encounter when working with this population? <ul style="list-style-type: none"><li>• Lack of resource</li><li>• Time constraints</li><li>• Lack of understanding or retention of information</li><li>• Lack of support (family members, organisation)</li><li>• Lack of training or knowledge</li></ul> |                                   |
| 3. | Are there any facilitators when working with this population? <ul style="list-style-type: none"><li>• Training/learning</li><li>• Experience</li><li>• Joint working</li><li>• Supportive family/friends network</li></ul>                                                                                                                                   |                                   |
| 4. | Do you find that falling is an issue for this population? <ul style="list-style-type: none"><li>• Different types of falls</li><li>• Consequences of falls</li></ul>                                                                                                                                                                                         |                                   |
| 5. | What do you find are the main reasons for falling in this population? <ul style="list-style-type: none"><li>• Cognition</li><li>• Anxiety/fear</li><li>• Physical limitations</li><li>• Lack of insight</li><li>• Environment</li><li>• Self-neglect</li></ul>                                                                                               |                                   |
| 6. | What kind of interventions have you used or tried to prevent falls in this population? <ul style="list-style-type: none"><li>• Cognitive strategies</li><li>• Physical strategies</li><li>• Environmental</li><li>• Family support</li><li>• Combining physical and cognitive strategies</li></ul>                                                           |                                   |
| 7. | What do you think might be the more effective intervention/s to prevent falls in this population? <ul style="list-style-type: none"><li>• Combining physical and cognitive strategies</li><li>• What aspect to focus on</li><li>• Joint working</li></ul>                                                                                                    |                                   |

Are there any other issues or comments you would like to make which you feel is important which we have not talked about?

**Table S2**  
**Thematic analysis – Flow Chart**

| Issues                                                                                                                                                                                                                 | Clusters                                                                                                                                              | Themes                                                                           |
|------------------------------------------------------------------------------------------------------------------------------------------------------------------------------------------------------------------------|-------------------------------------------------------------------------------------------------------------------------------------------------------|----------------------------------------------------------------------------------|
| <b>Assessment</b><br><b>Change</b><br><b>Environment</b><br><b>Knowledge</b><br><b>Time</b><br><b>Physical</b><br><b>Cognition</b><br><b>Collaboration</b><br><b>Support</b><br><b>Risk*</b><br><b>Person-centred*</b> | Assessment<br>Change<br>Environment<br>(Risk)*<br>(Person-Centre)* 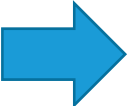 | On-going assessment is important in guiding interventions and influencing change |
|                                                                                                                                                                                                                        | Knowledge<br>Time<br>(Risk)*<br>(Person-centred)*                   | Knowledge and experience informs practice                                        |
|                                                                                                                                                                                                                        | Physical<br>Cognition<br>(Risk)*<br>(Person-centred)*              | Individuals living with dementia have complex physical and cognitive impairments |
|                                                                                                                                                                                                                        | Collaboration<br>Support<br>(Risk)*<br>(Person-centred)*          | Team-work is essential within falls prevention work                              |

\*Wider issues which fed into more than one cluster
